# Supplementary material
Source: PubMed Central journal article supplement (PMC2633562)
Supplement: 0810968106_0810968106SI.pdf [file 0810968106_0810968106SI.pdf]

# Supporting Information

Pandit *et al.* 10.1073/pnas.0810968106

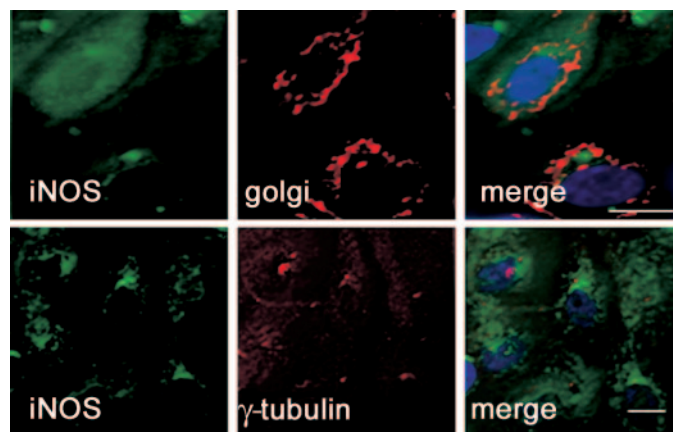

**Fig. S1.** Characterization of iNOS aggregates in primary normal human bronchial epithelial (NHBE) cells. Primary NHBE cells were grown to full differentiation at the air/liquid interface and stimulated for 30 h with a cytokine mixture similar to that used in Figs. 4 and 5. Cells were then fixed, stained with DAPI to visualize nuclei (blue), and immunolabeled using antibodies against iNOS (green), resident Golgi protein giantin (red), or centrosome marker  $\gamma$ -tubulin (red). (Scale bar, 10  $\mu$ m.)
